# Supplementary material
Source: MDPI journal article supplement (https://www.mdpi.com/2071-1050/14/5/2664)
Supplement: s1 [file s1]

# A Survey on Use of Plastic versus Biodegradable Bottles for Drinking Water Packaging in the United Arab Emirates

Himadri Rajput <sup>1,2</sup>, Munjed A. Maraqa <sup>1,2</sup>, Fatima Zraydi <sup>3</sup>, Lina A. Al Khatib <sup>4</sup>, Noor Ameen <sup>5</sup>, Rime Ben ElKaid <sup>6</sup>, Safia S. Al Jaber <sup>1</sup>, Noura A. Alharbi <sup>1</sup>, Reka Howard <sup>7</sup> and Ashraf Aly Hassan <sup>1,2,\*</sup>

**Figure S1:** Questionnaire about use of plastic versus biodegradable bottles for drinking water in the UAE.

## Questionnaire about Use of Plastic versus Biodegradable Bottles for Drinking Water in the UAE

### Your Rights to Know as a Participant

- **Topic:** You have been invited to take part in a study to investigate your views on environmental impacts associated with bottled water (not including refillable water containers) and sustainable alternatives.
- **Researchers:** This study will be conducted by Dr. Ashraf Aly Hassan and Dr. Munjed Maraqa in the Department of Civil & Environmental Engineering at United Arab Emirates University at Al Ain, UAE. For any question, please contact Dr. Hassan via email: [alyhassan@uaeu.ac.ae](mailto:alyhassan@uaeu.ac.ae)
- **Study purpose:** This study is intended for educational and research purposes.
- **Duration:** Participation in this study takes 15 minutes – [5 minutes explanation and 10 minutes for answering the questions].
- **Monetary benefits:** There are no monetary benefits associated with this study.
- **Procedure:** The questionnaire is available as a hard copy in Arabic and English. A digital copy will be available on survey monkey
- **Safety:** The questionnaire does not involve any type of risk either physical or psychological.
- **Confidentiality:** The participants' private information will not be revealed. Writing your name on the back side is voluntary.
- **Right to withdraw:** Your participation is voluntary. You can withdraw at any stage in the process.

| 1.                                                      | In which emirate do you live?<br><input type="checkbox"/> Abu Dhabi <input type="checkbox"/> Dubai <input type="checkbox"/> Sharjah <input type="checkbox"/> Ajman <input type="checkbox"/> Umm Al Quwain <input type="checkbox"/> Fujairah <input type="checkbox"/> Ras Al Khaimah                                                                                                                                                                                                                                                                                                                                                                                                                                                                                                                                                                                                                                                                                                                                                                                                                                                                                                                                                                                                                                                                                                                                                                                                                                                                            |                          |                          |                          |                          |       |                |      |                          |                          |                          |                          |                          |       |                          |                          |                          |                          |                          |         |                          |                          |                          |                          |                          |              |                          |                          |                          |                          |                          |                                                         |                          |                          |                          |                          |                          |                           |                          |                          |                          |                          |                          |
|---------------------------------------------------------|----------------------------------------------------------------------------------------------------------------------------------------------------------------------------------------------------------------------------------------------------------------------------------------------------------------------------------------------------------------------------------------------------------------------------------------------------------------------------------------------------------------------------------------------------------------------------------------------------------------------------------------------------------------------------------------------------------------------------------------------------------------------------------------------------------------------------------------------------------------------------------------------------------------------------------------------------------------------------------------------------------------------------------------------------------------------------------------------------------------------------------------------------------------------------------------------------------------------------------------------------------------------------------------------------------------------------------------------------------------------------------------------------------------------------------------------------------------------------------------------------------------------------------------------------------------|--------------------------|--------------------------|--------------------------|--------------------------|-------|----------------|------|--------------------------|--------------------------|--------------------------|--------------------------|--------------------------|-------|--------------------------|--------------------------|--------------------------|--------------------------|--------------------------|---------|--------------------------|--------------------------|--------------------------|--------------------------|--------------------------|--------------|--------------------------|--------------------------|--------------------------|--------------------------|--------------------------|---------------------------------------------------------|--------------------------|--------------------------|--------------------------|--------------------------|--------------------------|---------------------------|--------------------------|--------------------------|--------------------------|--------------------------|--------------------------|
| 2.                                                      | Which age bracket do you fall under?<br><input type="checkbox"/> 15-20 <input type="checkbox"/> 21-35 <input type="checkbox"/> 36-45 <input type="checkbox"/> 46-55 <input type="checkbox"/> 56 or older                                                                                                                                                                                                                                                                                                                                                                                                                                                                                                                                                                                                                                                                                                                                                                                                                                                                                                                                                                                                                                                                                                                                                                                                                                                                                                                                                       |                          |                          |                          |                          |       |                |      |                          |                          |                          |                          |                          |       |                          |                          |                          |                          |                          |         |                          |                          |                          |                          |                          |              |                          |                          |                          |                          |                          |                                                         |                          |                          |                          |                          |                          |                           |                          |                          |                          |                          |                          |
| 3.                                                      | What is your gender? <input type="checkbox"/> Male <input type="checkbox"/> Female                                                                                                                                                                                                                                                                                                                                                                                                                                                                                                                                                                                                                                                                                                                                                                                                                                                                                                                                                                                                                                                                                                                                                                                                                                                                                                                                                                                                                                                                             |                          |                          |                          |                          |       |                |      |                          |                          |                          |                          |                          |       |                          |                          |                          |                          |                          |         |                          |                          |                          |                          |                          |              |                          |                          |                          |                          |                          |                                                         |                          |                          |                          |                          |                          |                           |                          |                          |                          |                          |                          |
| 4.                                                      | What is your nationality? <input type="checkbox"/> UAE national <input type="checkbox"/> Expatriate [Please specify] _____                                                                                                                                                                                                                                                                                                                                                                                                                                                                                                                                                                                                                                                                                                                                                                                                                                                                                                                                                                                                                                                                                                                                                                                                                                                                                                                                                                                                                                     |                          |                          |                          |                          |       |                |      |                          |                          |                          |                          |                          |       |                          |                          |                          |                          |                          |         |                          |                          |                          |                          |                          |              |                          |                          |                          |                          |                          |                                                         |                          |                          |                          |                          |                          |                           |                          |                          |                          |                          |                          |
| 5.                                                      | If you are not a national of the UAE, how long have you been living in the country?<br><input type="checkbox"/> Less than 1 year <input type="checkbox"/> 1-2 years <input type="checkbox"/> 3-4 years <input type="checkbox"/> 5 years or more                                                                                                                                                                                                                                                                                                                                                                                                                                                                                                                                                                                                                                                                                                                                                                                                                                                                                                                                                                                                                                                                                                                                                                                                                                                                                                                |                          |                          |                          |                          |       |                |      |                          |                          |                          |                          |                          |       |                          |                          |                          |                          |                          |         |                          |                          |                          |                          |                          |              |                          |                          |                          |                          |                          |                                                         |                          |                          |                          |                          |                          |                           |                          |                          |                          |                          |                          |
| 6.                                                      | Please mark the highest level of education you have received<br><input type="checkbox"/> No school <input type="checkbox"/> Primary school <input type="checkbox"/> Secondary school <input type="checkbox"/> University degree                                                                                                                                                                                                                                                                                                                                                                                                                                                                                                                                                                                                                                                                                                                                                                                                                                                                                                                                                                                                                                                                                                                                                                                                                                                                                                                                |                          |                          |                          |                          |       |                |      |                          |                          |                          |                          |                          |       |                          |                          |                          |                          |                          |         |                          |                          |                          |                          |                          |              |                          |                          |                          |                          |                          |                                                         |                          |                          |                          |                          |                          |                           |                          |                          |                          |                          |                          |
| 7.                                                      | What is your monthly income in AED (Please, divide your income by the number of people in your household)?<br><input type="checkbox"/> I don't have an income <input type="checkbox"/> I prefer not to tell<br><input type="checkbox"/> Less than 5,000 <input type="checkbox"/> 5,000 – 10,000 <input type="checkbox"/> 10,000 – 35,000 <input type="checkbox"/> 35,000 – 50,000 <input type="checkbox"/> over 50,000                                                                                                                                                                                                                                                                                                                                                                                                                                                                                                                                                                                                                                                                                                                                                                                                                                                                                                                                                                                                                                                                                                                                         |                          |                          |                          |                          |       |                |      |                          |                          |                          |                          |                          |       |                          |                          |                          |                          |                          |         |                          |                          |                          |                          |                          |              |                          |                          |                          |                          |                          |                                                         |                          |                          |                          |                          |                          |                           |                          |                          |                          |                          |                          |
| 8.                                                      | How frequently do you drink tap water?<br><input type="checkbox"/> Never <input type="checkbox"/> Rarely <input type="checkbox"/> Most of the time <input type="checkbox"/> All the time                                                                                                                                                                                                                                                                                                                                                                                                                                                                                                                                                                                                                                                                                                                                                                                                                                                                                                                                                                                                                                                                                                                                                                                                                                                                                                                                                                       |                          |                          |                          |                          |       |                |      |                          |                          |                          |                          |                          |       |                          |                          |                          |                          |                          |         |                          |                          |                          |                          |                          |              |                          |                          |                          |                          |                          |                                                         |                          |                          |                          |                          |                          |                           |                          |                          |                          |                          |                          |
| 9.                                                      | Do you use tap water for cooking<br><input type="checkbox"/> Never <input type="checkbox"/> Rarely <input type="checkbox"/> Most of the time <input type="checkbox"/> All the time                                                                                                                                                                                                                                                                                                                                                                                                                                                                                                                                                                                                                                                                                                                                                                                                                                                                                                                                                                                                                                                                                                                                                                                                                                                                                                                                                                             |                          |                          |                          |                          |       |                |      |                          |                          |                          |                          |                          |       |                          |                          |                          |                          |                          |         |                          |                          |                          |                          |                          |              |                          |                          |                          |                          |                          |                                                         |                          |                          |                          |                          |                          |                           |                          |                          |                          |                          |                          |
| 10.                                                     | When do you drink tap water? (Select all that apply)<br><input type="checkbox"/> At home <input type="checkbox"/> At work <input type="checkbox"/> At restaurants <input type="checkbox"/> While travelling <input type="checkbox"/> I don't drink tap water at all                                                                                                                                                                                                                                                                                                                                                                                                                                                                                                                                                                                                                                                                                                                                                                                                                                                                                                                                                                                                                                                                                                                                                                                                                                                                                            |                          |                          |                          |                          |       |                |      |                          |                          |                          |                          |                          |       |                          |                          |                          |                          |                          |         |                          |                          |                          |                          |                          |              |                          |                          |                          |                          |                          |                                                         |                          |                          |                          |                          |                          |                           |                          |                          |                          |                          |                          |
| 11.                                                     | What are the reasons why you usually drink bottled water over tap water most often? (Select all that apply)<br><input type="checkbox"/> Taste <input type="checkbox"/> Color <input type="checkbox"/> Chlorine smell <input type="checkbox"/> Like to have cold water<br><input type="checkbox"/> Turbidity <input type="checkbox"/> Not applicable <input type="checkbox"/> Convenience/portability <input type="checkbox"/> Does not have a proper blend of minerals<br><input type="checkbox"/> Social habit <input type="checkbox"/> Concerns about microbial contamination <input type="checkbox"/> Concerns about chemical pollution<br><input type="checkbox"/> Never tasted tap water <input type="checkbox"/> Other [Specify] _____                                                                                                                                                                                                                                                                                                                                                                                                                                                                                                                                                                                                                                                                                                                                                                                                                   |                          |                          |                          |                          |       |                |      |                          |                          |                          |                          |                          |       |                          |                          |                          |                          |                          |         |                          |                          |                          |                          |                          |              |                          |                          |                          |                          |                          |                                                         |                          |                          |                          |                          |                          |                           |                          |                          |                          |                          |                          |
| 12.                                                     | On average, how much do you spend on single-use plastic bottled water per week (Please, state the amount either for yourself or per person in your household)? [amount is in AED]<br><input type="checkbox"/> Less than 10 <input type="checkbox"/> 10 - 30 <input type="checkbox"/> 30 - 100 <input type="checkbox"/> More than 100 <input type="checkbox"/> I am not sure <input type="checkbox"/> I don't buy bottled water                                                                                                                                                                                                                                                                                                                                                                                                                                                                                                                                                                                                                                                                                                                                                                                                                                                                                                                                                                                                                                                                                                                                 |                          |                          |                          |                          |       |                |      |                          |                          |                          |                          |                          |       |                          |                          |                          |                          |                          |         |                          |                          |                          |                          |                          |              |                          |                          |                          |                          |                          |                                                         |                          |                          |                          |                          |                          |                           |                          |                          |                          |                          |                          |
| 13.                                                     | Do you consider the cost of bottled water to be?<br><input type="checkbox"/> Cheap <input type="checkbox"/> Reasonable <input type="checkbox"/> Expensive                                                                                                                                                                                                                                                                                                                                                                                                                                                                                                                                                                                                                                                                                                                                                                                                                                                                                                                                                                                                                                                                                                                                                                                                                                                                                                                                                                                                      |                          |                          |                          |                          |       |                |      |                          |                          |                          |                          |                          |       |                          |                          |                          |                          |                          |         |                          |                          |                          |                          |                          |              |                          |                          |                          |                          |                          |                                                         |                          |                          |                          |                          |                          |                           |                          |                          |                          |                          |                          |
| 14.                                                     | Regarding bottled water, do you prefer to drink:<br><input type="checkbox"/> Locally manufactured brands <input type="checkbox"/> Imported brands<br><input type="checkbox"/> No preference when choosing between locally and imported brands <input type="checkbox"/> I don't drink bottled water                                                                                                                                                                                                                                                                                                                                                                                                                                                                                                                                                                                                                                                                                                                                                                                                                                                                                                                                                                                                                                                                                                                                                                                                                                                             |                          |                          |                          |                          |       |                |      |                          |                          |                          |                          |                          |       |                          |                          |                          |                          |                          |         |                          |                          |                          |                          |                          |              |                          |                          |                          |                          |                          |                                                         |                          |                          |                          |                          |                          |                           |                          |                          |                          |                          |                          |
| 15.                                                     | Please rate the criteria you use to purchase a bottled water:<br><table border="1"> <thead> <tr> <th></th> <th>Strongly disagree</th> <th>Disagree</th> <th>Neutral</th> <th>Agree</th> <th>Strongly agree</th> </tr> </thead> <tbody> <tr> <td>Cost</td> <td><input type="checkbox"/></td> <td><input type="checkbox"/></td> <td><input type="checkbox"/></td> <td><input type="checkbox"/></td> <td><input type="checkbox"/></td> </tr> <tr> <td>Brand</td> <td><input type="checkbox"/></td> <td><input type="checkbox"/></td> <td><input type="checkbox"/></td> <td><input type="checkbox"/></td> <td><input type="checkbox"/></td> </tr> <tr> <td>Quality</td> <td><input type="checkbox"/></td> <td><input type="checkbox"/></td> <td><input type="checkbox"/></td> <td><input type="checkbox"/></td> <td><input type="checkbox"/></td> </tr> <tr> <td>Availability</td> <td><input type="checkbox"/></td> <td><input type="checkbox"/></td> <td><input type="checkbox"/></td> <td><input type="checkbox"/></td> <td><input type="checkbox"/></td> </tr> <tr> <td>Personal preferences (taste, low sodium, pH level, etc)</td> <td><input type="checkbox"/></td> <td><input type="checkbox"/></td> <td><input type="checkbox"/></td> <td><input type="checkbox"/></td> <td><input type="checkbox"/></td> </tr> <tr> <td>Packaging (specify) _____</td> <td><input type="checkbox"/></td> <td><input type="checkbox"/></td> <td><input type="checkbox"/></td> <td><input type="checkbox"/></td> <td><input type="checkbox"/></td> </tr> </tbody> </table> |                          | Strongly disagree        | Disagree                 | Neutral                  | Agree | Strongly agree | Cost | <input type="checkbox"/> | Brand | <input type="checkbox"/> | Quality | <input type="checkbox"/> | Availability | <input type="checkbox"/> | Personal preferences (taste, low sodium, pH level, etc) | <input type="checkbox"/> | Packaging (specify) _____ | <input type="checkbox"/> |
|                                                         | Strongly disagree                                                                                                                                                                                                                                                                                                                                                                                                                                                                                                                                                                                                                                                                                                                                                                                                                                                                                                                                                                                                                                                                                                                                                                                                                                                                                                                                                                                                                                                                                                                                              | Disagree                 | Neutral                  | Agree                    | Strongly agree           |       |                |      |                          |                          |                          |                          |                          |       |                          |                          |                          |                          |                          |         |                          |                          |                          |                          |                          |              |                          |                          |                          |                          |                          |                                                         |                          |                          |                          |                          |                          |                           |                          |                          |                          |                          |                          |
| Cost                                                    | <input type="checkbox"/>                                                                                                                                                                                                                                                                                                                                                                                                                                                                                                                                                                                                                                                                                                                                                                                                                                                                                                                                                                                                                                                                                                                                                                                                                                                                                                                                                                                                                                                                                                                                       | <input type="checkbox"/> | <input type="checkbox"/> | <input type="checkbox"/> | <input type="checkbox"/> |       |                |      |                          |                          |                          |                          |                          |       |                          |                          |                          |                          |                          |         |                          |                          |                          |                          |                          |              |                          |                          |                          |                          |                          |                                                         |                          |                          |                          |                          |                          |                           |                          |                          |                          |                          |                          |
| Brand                                                   | <input type="checkbox"/>                                                                                                                                                                                                                                                                                                                                                                                                                                                                                                                                                                                                                                                                                                                                                                                                                                                                                                                                                                                                                                                                                                                                                                                                                                                                                                                                                                                                                                                                                                                                       | <input type="checkbox"/> | <input type="checkbox"/> | <input type="checkbox"/> | <input type="checkbox"/> |       |                |      |                          |                          |                          |                          |                          |       |                          |                          |                          |                          |                          |         |                          |                          |                          |                          |                          |              |                          |                          |                          |                          |                          |                                                         |                          |                          |                          |                          |                          |                           |                          |                          |                          |                          |                          |
| Quality                                                 | <input type="checkbox"/>                                                                                                                                                                                                                                                                                                                                                                                                                                                                                                                                                                                                                                                                                                                                                                                                                                                                                                                                                                                                                                                                                                                                                                                                                                                                                                                                                                                                                                                                                                                                       | <input type="checkbox"/> | <input type="checkbox"/> | <input type="checkbox"/> | <input type="checkbox"/> |       |                |      |                          |                          |                          |                          |                          |       |                          |                          |                          |                          |                          |         |                          |                          |                          |                          |                          |              |                          |                          |                          |                          |                          |                                                         |                          |                          |                          |                          |                          |                           |                          |                          |                          |                          |                          |
| Availability                                            | <input type="checkbox"/>                                                                                                                                                                                                                                                                                                                                                                                                                                                                                                                                                                                                                                                                                                                                                                                                                                                                                                                                                                                                                                                                                                                                                                                                                                                                                                                                                                                                                                                                                                                                       | <input type="checkbox"/> | <input type="checkbox"/> | <input type="checkbox"/> | <input type="checkbox"/> |       |                |      |                          |                          |                          |                          |                          |       |                          |                          |                          |                          |                          |         |                          |                          |                          |                          |                          |              |                          |                          |                          |                          |                          |                                                         |                          |                          |                          |                          |                          |                           |                          |                          |                          |                          |                          |
| Personal preferences (taste, low sodium, pH level, etc) | <input type="checkbox"/>                                                                                                                                                                                                                                                                                                                                                                                                                                                                                                                                                                                                                                                                                                                                                                                                                                                                                                                                                                                                                                                                                                                                                                                                                                                                                                                                                                                                                                                                                                                                       | <input type="checkbox"/> | <input type="checkbox"/> | <input type="checkbox"/> | <input type="checkbox"/> |       |                |      |                          |                          |                          |                          |                          |       |                          |                          |                          |                          |                          |         |                          |                          |                          |                          |                          |              |                          |                          |                          |                          |                          |                                                         |                          |                          |                          |                          |                          |                           |                          |                          |                          |                          |                          |
| Packaging (specify) _____                               | <input type="checkbox"/>                                                                                                                                                                                                                                                                                                                                                                                                                                                                                                                                                                                                                                                                                                                                                                                                                                                                                                                                                                                                                                                                                                                                                                                                                                                                                                                                                                                                                                                                                                                                       | <input type="checkbox"/> | <input type="checkbox"/> | <input type="checkbox"/> | <input type="checkbox"/> |       |                |      |                          |                          |                          |                          |                          |       |                          |                          |                          |                          |                          |         |                          |                          |                          |                          |                          |              |                          |                          |                          |                          |                          |                                                         |                          |                          |                          |                          |                          |                           |                          |                          |                          |                          |                          |
| 16.                                                     | Do you care about plastic pollution especially single-use plastic bottles?<br><input type="checkbox"/> Yes <input type="checkbox"/> No <input type="checkbox"/> I don't know enough about the topic                                                                                                                                                                                                                                                                                                                                                                                                                                                                                                                                                                                                                                                                                                                                                                                                                                                                                                                                                                                                                                                                                                                                                                                                                                                                                                                                                            |                          |                          |                          |                          |       |                |      |                          |                          |                          |                          |                          |       |                          |                          |                          |                          |                          |         |                          |                          |                          |                          |                          |              |                          |                          |                          |                          |                          |                                                         |                          |                          |                          |                          |                          |                           |                          |                          |                          |                          |                          |

|     |                                                                                                                                                                                                                                                                                                                                                                                                                                                                                                                                                                                                                                    |                                                                                                                                                                                                                                                                                                  |
|-----|------------------------------------------------------------------------------------------------------------------------------------------------------------------------------------------------------------------------------------------------------------------------------------------------------------------------------------------------------------------------------------------------------------------------------------------------------------------------------------------------------------------------------------------------------------------------------------------------------------------------------------|--------------------------------------------------------------------------------------------------------------------------------------------------------------------------------------------------------------------------------------------------------------------------------------------------|
| 17. | Rate how important it is for you to purchase a product that has minimal or no harm on the environment.                                                                                                                                                                                                                                                                                                                                                                                                                                                                                                                             |                                                                                                                                                                                                                                                                                                  |
|     | <div style="text-align: center;"> 0 <input type="checkbox"/> 1 <input type="checkbox"/> 2 <input type="checkbox"/> 3 <input type="checkbox"/> 4 <input type="checkbox"/> 5 <input type="checkbox"/> 6 <input type="checkbox"/> 7 <input type="checkbox"/> 8 <input type="checkbox"/> 9 <input type="checkbox"/> 10 <input type="checkbox"/><br/> <b>Not Important</b> <span style="float: right;"><b>Very Important</b></span> </div>                                                                                                                                                                                              |                                                                                                                                                                                                                                                                                                  |
| 18. | Do you recycle your single-use plastic water bottles or other plastic products?<br><input type="checkbox"/> Always <input type="checkbox"/> Occasionally (more than 50% of the time) <input type="checkbox"/> Rarely (less than 50% of the time)<br><input type="checkbox"/> Never (please explain why) _____                                                                                                                                                                                                                                                                                                                      |                                                                                                                                                                                                                                                                                                  |
| 19. | Do you know the difference between 100% biodegradable versus recyclable plastic?<br><input type="checkbox"/> Yes <input type="checkbox"/> No <input type="checkbox"/> I'm not interested to know (please explain)                                                                                                                                                                                                                                                                                                                                                                                                                  |                                                                                                                                                                                                                                                                                                  |
| 20. | How likely are you willing to purchase water that is packaged in a 100% biodegradable bottle that decomposes in 90 days and creates zero waste, is carbon neutral and contains no harmful chemicals?<br><div style="text-align: center;"> 0 <input type="checkbox"/> 1 <input type="checkbox"/> 2 <input type="checkbox"/> 3 <input type="checkbox"/> 4 <input type="checkbox"/> 5 <input type="checkbox"/> 6 <input type="checkbox"/> 7 <input type="checkbox"/> 8 <input type="checkbox"/> 9 <input type="checkbox"/> 10 <input type="checkbox"/><br/> <b>Never</b> <span style="float: right;"><b>Very Likely</b></span> </div> |                                                                                                                                                                                                                                                                                                  |
| 21. | How much more are you willing to pay per bottle to switch from single-use plastic bottled water to water packaged in 100% biodegradable material?<br><div style="text-align: center;"> None <input type="checkbox"/> AED 0.25 <input type="checkbox"/> AED 0.5 <input type="checkbox"/> AED 0.75 <input type="checkbox"/> AED 1 <input type="checkbox"/> AED 1.5 <input type="checkbox"/><br/> AED 2 <input type="checkbox"/> AED 2.5 <input type="checkbox"/> AED 3 <input type="checkbox"/> AED 3.5 <input type="checkbox"/> AED 4 <input type="checkbox"/> </div>                                                               |                                                                                                                                                                                                                                                                                                  |
| 22. | In your opinion, what can be done to encourage consumers to buy water in biodegradable bottles? <b>(Select all that apply)</b>                                                                                                                                                                                                                                                                                                                                                                                                                                                                                                     |                                                                                                                                                                                                                                                                                                  |
|     | <input type="checkbox"/> Provide more information about the positive impact of biodegradable bottles on the environment<br><input type="checkbox"/> Provide incentives to switch to biodegradable plastic<br><input type="checkbox"/> Provide bins in convenient locations to dispose of biodegradable bottles<br><input type="checkbox"/> Introduce legislation to phase out or ban single use plastic                                                                                                                                                                                                                            | <input type="checkbox"/> Price it the same as plastic bottles<br><input type="checkbox"/> Make biodegradable bottles more accessible and available<br><input type="checkbox"/> Improve awareness on plastic pollution through social campaigns<br><input type="checkbox"/> Other [specify] _____ |
| 23. | From where do you usually obtain information about recycling initiatives in the UAE?<br><input type="checkbox"/> TV <input type="checkbox"/> Newspaper <input type="checkbox"/> Internet <input type="checkbox"/> Friends/relatives<br><input type="checkbox"/> Books/Journals <input type="checkbox"/> None <input type="checkbox"/> Other [Specify] _____                                                                                                                                                                                                                                                                        |                                                                                                                                                                                                                                                                                                  |
| 24. | From where do you usually obtain information about bottled water quality?<br><input type="checkbox"/> TV <input type="checkbox"/> Newspaper <input type="checkbox"/> Internet <input type="checkbox"/> Friends/relatives <input type="checkbox"/> Bottle label<br><input type="checkbox"/> Books/Journals <input type="checkbox"/> None <input type="checkbox"/> Other [Specify] _____                                                                                                                                                                                                                                             |                                                                                                                                                                                                                                                                                                  |
| 25. | What is your occupation?<br><input type="checkbox"/> Hospitality <input type="checkbox"/> Agriculture <input type="checkbox"/> Medical professions <input type="checkbox"/> Education & Academia <input type="checkbox"/> Retail<br><input type="checkbox"/> Banking <input type="checkbox"/> Engineering <input type="checkbox"/> Business <input type="checkbox"/> Other [Specify] _____                                                                                                                                                                                                                                         |                                                                                                                                                                                                                                                                                                  |
| 26. | Which one describes your job better?<br><input type="checkbox"/> Private sector <input type="checkbox"/> Public sector                                                                                                                                                                                                                                                                                                                                                                                                                                                                                                             |                                                                                                                                                                                                                                                                                                  |

**Optional Consent Form**

1. I confirm that I have read and understood the above information sheet and have had the opportunity to ask questions.
2. I understand that my participation is voluntary and that I am free to withdraw.
3. I understand that my data will be kept confidential and if published, the data will not be identifiable as mine.

I agree to take part in this study:

|                                                                                                                        |        |
|------------------------------------------------------------------------------------------------------------------------|--------|
| (Name and signature of participant)                                                                                    | (Date) |
| (Name and signature of witness (if participant unable to read/write))                                                  | (Date) |
| (Name and signature of parent/guardian/next of kin (when participant unable to give consent due to age or incapacity)) | (Date) |

**Thank you very much for your time and opinions**

|                                               |
|-----------------------------------------------|
| Collected by: _____ ID no.: _____ Date: _____ |
| Serial number: _____                          |
